# Supplementary material
Source: PubMed Central journal article supplement (PMC2681442)
Supplement: supp_91294.2008_legend.pdf [file supp_91294.2008_legend.pdf]

## Supplementary Data.

### Figure Legends.

**Suppl. Figure 1) Oleic acid causes a membrane depolarization associated with an increase in membrane resistance.**

**a1 and a2)** Whole-cell recording from a POMC neuron. Under control conditions in the presence of CNQX, DL-APV, picrotoxin, strychnine and tetrodotoxin ( $\mu\text{M}$ ; 10, 50, 100, 1 and 1, respectively),  $V_m$  was  $-61\text{mV}$ . Hyperpolarizing current steps ( $100\text{pA}$ ,  $100\text{ms}$ ) were applied at  $0.2\text{ Hz}$  to monitor changes in membrane resistance ( $R_m$ ) before, during and after treatment with oleic acid ( $50\mu\text{M}$ ). Membrane hyperpolarization after access in whole-cell mode was associated with a fall in  $R_m$ . Treatment with oleic acid induced a membrane depolarization with a robust increase in  $R_m$ . Scale bar:  $200\text{mV}$ ,  $5\text{min}$ . **a2.** Responses to hyperpolarizing current steps on an expanded time scale with and without oleic acid. Scale bar:  $20\text{mV}$ ,  $50\text{ms}$ .

b) Summary of the membrane resistance data obtained from 8 separate experiments (control:  $466\pm 72\text{M}\Omega$ ; oleic acid:  $617\pm 81\text{M}\Omega$ ;  $n=8$ ;  $p=0.005$ ).
